# Supplementary material for: Choosing algorithms for TB screening: a modelling study to compare yield, predictive value and diagnostic burden
Source: PubMed Central journal article supplement (PMC4287425; doi:10.1186/1471-2334-14-532), 2014-10-19

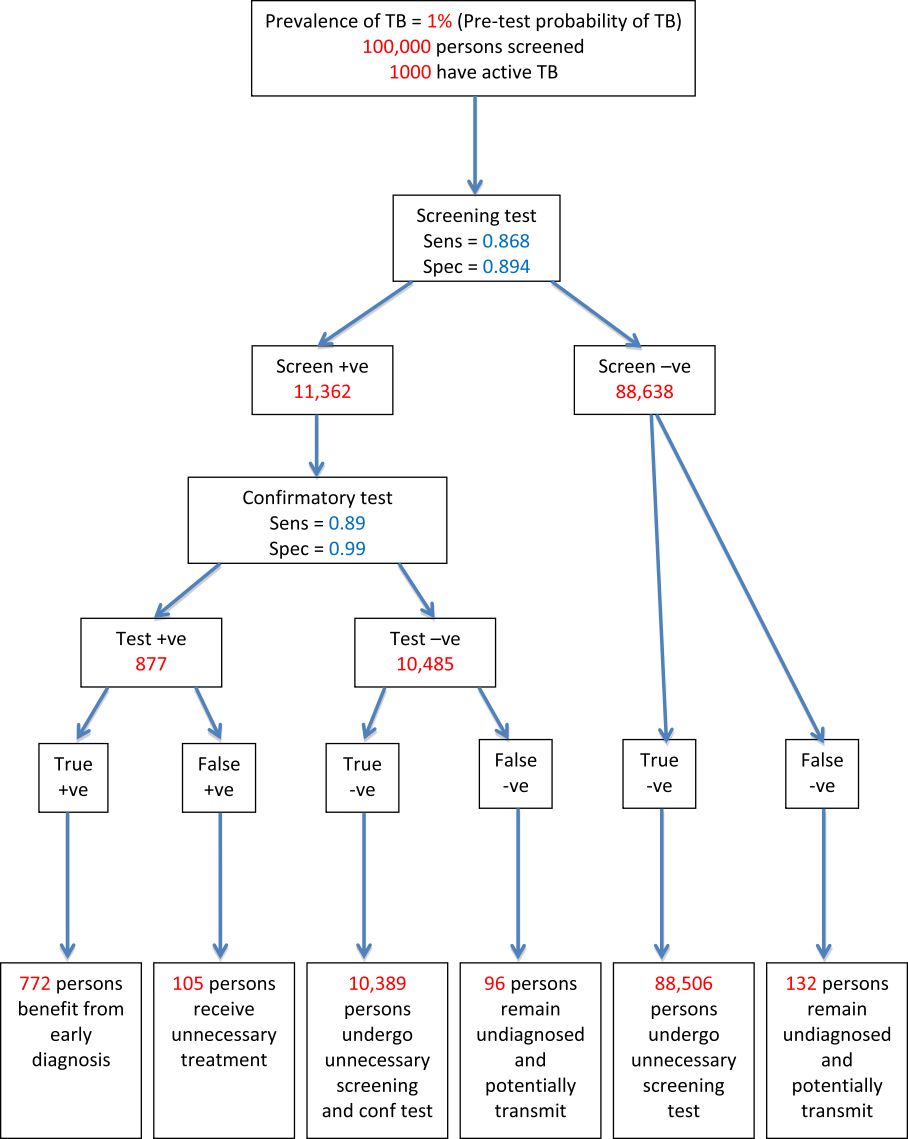

Supplement: 12879_2014_4008_MOESM4_ESM.pdf [file 12879_2014_4008_MOESM4_ESM.pdf]
